# Supplementary material
Source: publisher site journal article supplement (https://www.degruyterbrill.com/publication/isbn/9783050061245/downloadAsset/9783050061245_Buchinformation.pdf)
Supplement: Supplementary file 1 [file 9783050061245_Buchinformation.pdf]

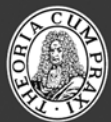

# Akademie Verlag

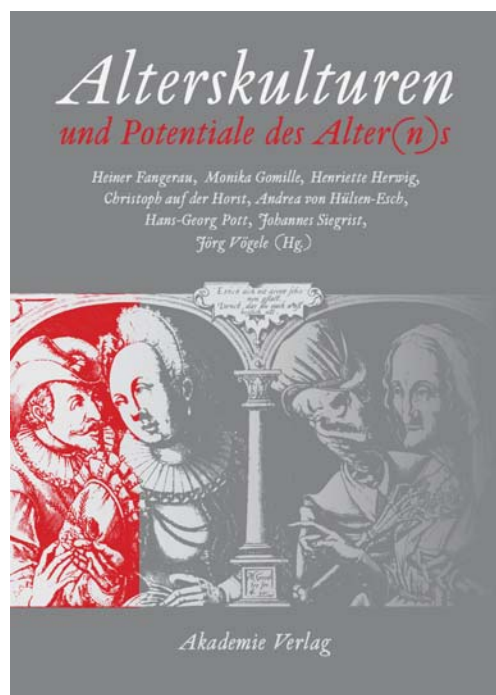

## Alterskulturen und Potentiale des Alter(n)s

Herausgegeben von Heiner Fangerau, Monika Gomille,  
Henriette Herwig, Christoph auf der Horst, Andrea von  
Hülßen-Esch, Hans-Georg Pott, Johannes Siegrist und  
Jörg Vögele

2007. 253 Seiten, 27 s/w- und 3 Farabbildungen,  
170 x 240 mm, Festeinband, € 49,80  
ISBN 978-3-05-004348-7

Das Altern ist nicht nur eine biologische, sondern auch eine kulturelle Tatsache. Als Objekt der Verhandlungen zwischen Wissensdiskursen erscheint Alter(n) als ein ebenso heterogenes wie problematisches Phänomen, das von Werturteilen und Weltanschauungen bestimmt wird. Des Weiteren sind Alter(n) und Medizin in der öffentlichen Meinung moderner Gesellschaften eng miteinander verbunden. Das interdisziplinäre Forschungsprojekt „Kulturelle Variationen und Repräsentationen des Alter(n)s“ geht von einem erweiterten, die geistes-, sozial- und medizinwissenschaftlichen Diskurse integrierenden Konzept von Alterskulturen und Potentialen des Alter(n)s aus. Dies bedeutet, Alter(n) als Gegenstand des Wissens und als Konzept zu begreifen. Alterskonzepte, das heißt Vorstellungen, Wertungen und ‚Bilder‘ des Alter(n)s, sind Deutungsmuster für elementare Bedürfnisse an der Schnittstelle von individuellem und kollektivem Leben.

Mit Beiträgen von David Blane, Heiner Fangerau, Gerd Göckenjan, Monika Gomille, Anouk Janssen, Stefanie Knöll, Thomas Küpper, Simone Moses, Gopalakrishnan Netuveli, Giovanna Pinna, Hans-Georg Pott, Peter Rusterholz, Jean-Claude Schmitt, Anja Schonlau, Miriam Seidler, Johannes Siegrist, Pat Thane, Morten Wahrendorf, Hiltrud Westermann-Angerhausen, Jörg Vögele.
